# Supplementary material for: Characterisation of 20S Proteasome in Tritrichomonas foetus and Its Role during the Cell Cycle and Transformation into Endoflagellar Form
Source: PubMed Central journal article supplement (PMC4457923; doi:10.1371/journal.pone.0129165), 2015-06-05
Supplement: pone.0129165.s002.pdf [file pone.0129165.s002.pdf]

|           |                                                                                                                                                                                                                                                                                                                                                                                                                                                                                                                                        |
|-----------|----------------------------------------------------------------------------------------------------------------------------------------------------------------------------------------------------------------------------------------------------------------------------------------------------------------------------------------------------------------------------------------------------------------------------------------------------------------------------------------------------------------------------------------|
| TfoetusA1 | <p><b>Sequence</b></p> <p>MSSSADRFRITIFSQEGRWQVEYAFKAVKQAEVTAIGAKGANSLLVVAVQKKVQDKLIDPSTVTHMFRIT<br/> EHVGACLIIGLLPDVLYICRRLRYDAAQFQFNGFEI PVNILLSRLSEIHQIESQYSGARPTGVSAIIFG<br/> FEPSKNDFFALYKVEPSGFTSGYRAVSCGVKEVEAMSALEKKYESFPTEKETAEFVISTLQTVVGLDFEA<br/> REVEVAVVTRENTAYRVMKADEVEKVLTAVAEKD</p> <p><b>Motif</b>                      <b>Identifier</b>    <b>Score</b>    <b>E-value</b>    <b>KEGG orthology</b><br/> Proteasome_alpha_type_6    cd03754    264.10    8.83E-89    20S proteasome subunit alpha 1 (K02730)</p>    |
| TfoetusA2 | <p><b>Sequence</b></p> <p>MGDSDFSLTTTFSSGGKLGQIEHALKAVSLSGQCQVGVKAKDGAVIACESKPPSPLAERDTNLKVQAINPN<br/> VGCVYSGIITDYRVLLKLRKEAMKYKLRGVEVMPREVVKSAAAINQSYTQSGGVRPFGVSLLIIGWE<br/> DIPTLWQVDPSTFWAWKATALGKRSDGSRFTFLERRYNEVDDAIHTAISTLKEGFDGQLTKDLIEI<br/> GVVDKTHKFRTLSTEEIEDFLTEV</p> <p><b>Motif</b>                      <b>Identifier</b>    <b>Score</b>    <b>E-value</b>    <b>KEGG orthology</b><br/> Proteasome_alpha_type_2    cd03750    324.66    1.85E-112    20S proteasome subunit alpha 2 (K02726)</p>                   |
| TfoetusA3 | <p><b>Sequence</b></p> <p>MSYRYDAGTTTFSSDGRILQVEYAIQSINQAGTAIGVQFSNGVVLAAEKNTGRLVDYLFPEKMAKLDE<br/> HVITALAGMTADANNLVDVFMRSQAQSYLKYTGEPMPVEQLVRRVCDKHSYTQYGLRPGVGSFLIAGY<br/> DRHKGCLYLTDPSTGNGGKATAIGENNTAQSILKSSYKDDMNATEAMDLTVKVLCCTLSTSLSD<br/> KLEFVSVLQYSEKTPKVRILTAEVEHLMKRFEDTIKATTEEKE</p> <p><b>Motif</b>                      <b>Identifier</b>    <b>Score</b>    <b>E-value</b>    <b>KEGG orthology</b><br/> Proteasome_alpha_type_4    cd03752    328.92    5.75E-114    20S proteasome subunit alpha 3 (K02728)</p>    |
| TfoetusA4 | <p><b>Sequence</b></p> <p>MSHYARSI TRFSPDGRLEFQIDHAQAQVQRGTTVVAVQSKDLIVIAVEKLTIAKLQDPCTFRKVVVA<br/> LDDHVMCAFAGLHADARVLVQKAQVEQCQSHRLTYEDPITVERIARHIATLQLKYTQSGGVRPFGV<br/> ATLVCGFDSTTKQPHIYETLPSGAYAEWKARTIGRHDQTVMEYLEKHYKDDMTDDDAIKMAVGS<br/> LEVVENGAKNLEVALMKCGEPMVLMKEQLAPLIEAINKK</p> <p><b>Motif</b>                      <b>Identifier</b>    <b>Score</b>    <b>E-value</b>    <b>KEGG orthology</b><br/> Proteasome_alpha_type_7    cd03755    322.39    8.68E-112    20S proteasome subunit alpha 4 (K02731)</p>          |
| TfoetusA5 | <p><b>Sequence</b></p> <p>MFQSSSEYDRNVNTFSPDGRLLQVEYAIQAVKLGSSAIAILCPEGVVFVEKRLSSPLLISSVERVYA<br/> IDEHIGVVLAGYPADGRTMVDHMRVAAQDHRFSFGEPIGIRAVTESVCDLALSFGEGRRKREGQMSRPF<br/> GAALLVSGIDNGKPFLEHTDPSGTYTQCRARAIGGSEGAETILRDSYHDGMTLEEAENLALSTLRQVI<br/> QEKLSENNIEVACANVQTGRFKVYSAEQRAIVERLPPPLIQE</p> <p><b>Motif</b>                      <b>Identifier</b>    <b>Score</b>    <b>E-value</b>    <b>KEGG orthology</b><br/> Proteasome_alpha_type_5    cd03753    331.22    5.56E-115    20S proteasome subunit alpha 5 (K02729)</p> |
| TfoetusA6 | <p><b>Sequence</b></p> <p>MFRSRYDGDTTTFSPGRLLQVENAMKAVQQGMSTVGI RSTHAVIACIMHSPSEFSSFPKIFKIDEH<br/> IGVTISGLTADGRGLCKMLRSECLRHKFVYGTESKVVSTLADFIADRSQNKTKQVKGKRPYGVLLMIGAN<br/> PADGPRLFETCPGQNYEYDAQSIGRRSQAAKTYLEQNLPEFHNSTRDELIKHALKALFDCRAKEENGL<br/> ECFAVGVVGVDEPFMIIEGDALRPYFSE</p> <p><b>Motif</b>                      <b>Identifier</b>    <b>Score</b>    <b>E-value</b>    <b>KEGG orthology</b><br/> Proteasome_alpha_type_1    cd03749    297.28    6.74E-102    20S proteasome subunit alpha 6 (K02725)</p>              |
| TfoetusA7 | <p><b>Sequence</b></p> <p>MSGAGSGYDFNAFTFSPDGRLEFQVEYATKAVDKAALGVRCSGVLFAVEKNLSSKLLTPGGNPRTFW<br/> IDTHIACATVGYRSDSYAAVLQARKEAANYFETFGCKITVPELVSRVAHTFHSSSHAFSSIRPYGCALLI<br/> GSLEGPSLYALEPNGQYFGYYACCFGKGSLLARAELQRTDWGEKTVEEAVPLVANI IKELHEAQNKTWE<br/> IEMLVWCQASEGKPKVPESLFVAAQ</p> <p><b>Motif</b>                      <b>Identifier</b>    <b>Score</b>    <b>E-value</b>    <b>KEGG orthology</b><br/> Proteasome_alpha_type_3    cd03751    247.19    3.13E-82    20S proteasome subunit alpha 7 (K02727)</p>                |
