# Supplementary material for: Characterisation of 20S Proteasome in Tritrichomonas foetus and Its Role during the Cell Cycle and Transformation into Endoflagellar Form
Source: PubMed Central journal article supplement (PMC4457923; doi:10.1371/journal.pone.0129165), 2015-06-05
Supplement: pone.0129165.s003.pdf [file pone.0129165.s003.pdf]

|           |                                                                                                                                                                                                                                                                                                                                                                                                                                                                                                                                                         |
|-----------|---------------------------------------------------------------------------------------------------------------------------------------------------------------------------------------------------------------------------------------------------------------------------------------------------------------------------------------------------------------------------------------------------------------------------------------------------------------------------------------------------------------------------------------------------------|
| TfoetusB1 | <p><b>Sequence</b></p> <p>MTNPNALVEMTGTTLFAIKTADGVVFAADSRSTAGSTVACRTSNKITQISSKVFVARTGSTADTQALAR<br/> YGHYILNVLTMNSESEVKRPVLVASQYLRKVLQSNKEYLSASLICGGIEDDGTPSLYEINTSGMAIPRD<br/> FCLNGSGSSYILAFCDKEYRDNMTMEEATKFAIEAVTNAIIRDGASGGFVNIVQVTKDQTKRFVVMPKD<br/> QPYNHSVVKT</p> <p><b>Motif</b>                      <b>Identifier</b>   <b>Score</b>   <b>E-value</b>      <b>KEGG orthology</b></p> <p>Proteasome_beta_type_6   cd03762   197.06   2.65E-63   20S proteasome subunit beta 1 (K02738)</p>                                                    |
| TfoetusB2 | <p><b>Sequence</b></p> <p>MQNKGFDFDLIARNESLKVQPKKLKTGTTIAAAVFDGGVVLGADTRATAGPVVAVKDEFKIHYSNDNIW<br/> CCGAGTAADNDQITTLISSKLRLYTMNSGMQPRVYQAATLLTSRLFKYQGYIEAYLIVAGVDFQGPSVY<br/> TMYANGSCSKSPFSTMGSGSMAAVSVLEAGWKPKMSEEACKELVADAI EAGITNDLGSGSNVNL CVIKN<br/> TGHEYISHYRVTNERTFRMNAPIKRGTEIVISSSTTKPLHPPEVHLEILDGVAEEAAA</p> <p><b>Motif</b>                      <b>Identifier</b>   <b>Score</b>   <b>E-value</b>      <b>KEGG orthology</b></p> <p>Proteasome_beta_type_7   cd03763   292.18   8.63E-100   20S proteasome subunit beta 2 (K02739)</p> |
| TfoetusB3 | <p><b>Sequence</b></p> <p>MSSGIDTQNGVSVVAMAGDHCVAIAADRRLGAQMOTVSTNFKKIFQINDYIHVGMGLATDIDTVYEKL<br/> RYDVNLLLELREERQLEPIRFMSLVRSLLEYHRFGPYFVSPVIAGLDPATNEPYLATSDSIGAFNQPKDF<br/> AVAGTSEESLYGICESMWRPGLNPDELFDVISQCLIAAVERDGLSGWGAVVHIITPESVVVKEIKTRMD</p> <p><b>Motif</b>                      <b>Identifier</b>   <b>Score</b>   <b>E-value</b>      <b>KEGG orthology</b></p> <p>Proteasome_beta_type_3   cd03759   317.65   1.23E-110   20S proteasome subunit beta 3 (K02735)</p>                                                                   |
| TfoetusB4 | <p><b>Sequence</b></p> <p>MLSIVGLCGPDWVLI AADSSVSSSIICMSEEDRIAEIGKHNALALAGETGDALQLSEYIIGNVALYKF<br/> INSVELTTDAISHYIRNEMAKAVRKNPYQVNMLLAGYDEKPSLYYLDYLGTRQKIPFGAQGYCAYFVLS<br/> VFDKFEENMSLEKGEVMKKALDQIKQRFTIAPHGFIVKLIDANGIQKINLD</p> <p><b>Motif</b>                      <b>Identifier</b>   <b>Score</b>   <b>E-value</b>      <b>KEGG orthology</b></p> <p>Proteasome_beta_type_2   cd03758   236.33   5.68E-79   20S proteasome subunit beta 4 (K02734)</p>                                                                                      |
| TfoetusB5 | <p><b>Sequence</b></p> <p>MSSLQFPQHVDVIDGENQAPLQPANVEDPCGF IKNHLHFNYTNDAPDSNR IAAHYGTTCLSFIYKGGIVV<br/> AVDSRATGGSFIFSGTVMKILDIAPNMI GTMAGGAADCQYWLRLSRLSRLHNFYRQQPLTVAAASKIL<br/> VNELYSYKGYNLSIGTMICGYDSTGPHIFYIDNDGSRLEGKRFSVSGSTYAYGVLDTCYKYEMTKEEA<br/> CDLGRKAIYHATYRDSGSGGRVTVVHIDENGAQRISQTDVFDIHDFDKKVE</p> <p><b>Motif</b>                      <b>Identifier</b>   <b>Score</b>   <b>E-value</b>      <b>KEGG orthology</b></p> <p>Proteasome_beta_type_5   cd03761   313.80   2.04E-108   20S proteasome subunit beta 5 (K02737)</p>        |
| TfoetusB6 | <p><b>Sequence</b></p> <p>MHSEVAGKIEDKKGWSPYDNHGGTSVGI V GKDFVAIGTDTRLSSNYSISCRHKSRVFQMTSKAMIVAT<br/> GFDGDI DAFVTRIRQILVRYQOEHFKE MSTESLALCVSNILYSKRFFPYINILVGGIGLKDEGLLYGY<br/> DPVGTLECLNYDAHGTGSPMAMPILDNHFGSMHNTTPFPHPVEVDDAVNLIRDIMASVSERDIYTGDCCL<br/> QVAVMKSDGNLTIITEYELPAH</p> <p><b>Motif</b>                      <b>Identifier</b>   <b>Score</b>   <b>E-value</b>      <b>KEGG orthology</b></p> <p>Proteasome_beta_type_1   cd03757   214.04   2.28E-69   20S proteasome subunit beta 6 (K02732)</p>                                     |
| TfoetusB7 | <p><b>Sequence</b></p> <p>MSGYKKSQNPITTTNSIIAAKYKDGILLASDRAVSYGSCFKFANVSHFAKLT PNI IIGGTGELADFQE<br/> LVDVLRSIIVDEECKNNGESLTPSEVSNYIKRLMYERRSKMNPV MRCILAGIDKDGSKLLTATDLYGT<br/> QWEDEYVASGYGAHMQGVQIPKALKSADVTRDVMDA I KEVFI GLTARHSTMSGPIEFVDVTANGIEFL<br/> DPIEIVPNWDVLDDEDWAQ</p> <p><b>Motif</b>                      <b>Identifier</b>   <b>Score</b>   <b>E-value</b>      <b>KEGG orthology</b></p> <p>Ntn_hydrolase super family   cl00467   173.53   7.65E-54   20S proteasome subunit beta 7 (K02736)</p>                                    |
